# Supplementary material
Source: PubMed Central journal article supplement (PMC8092537)
Supplement: AAC.02254-20-s0001.pdf [file AAC.02254-20-s0001.pdf]

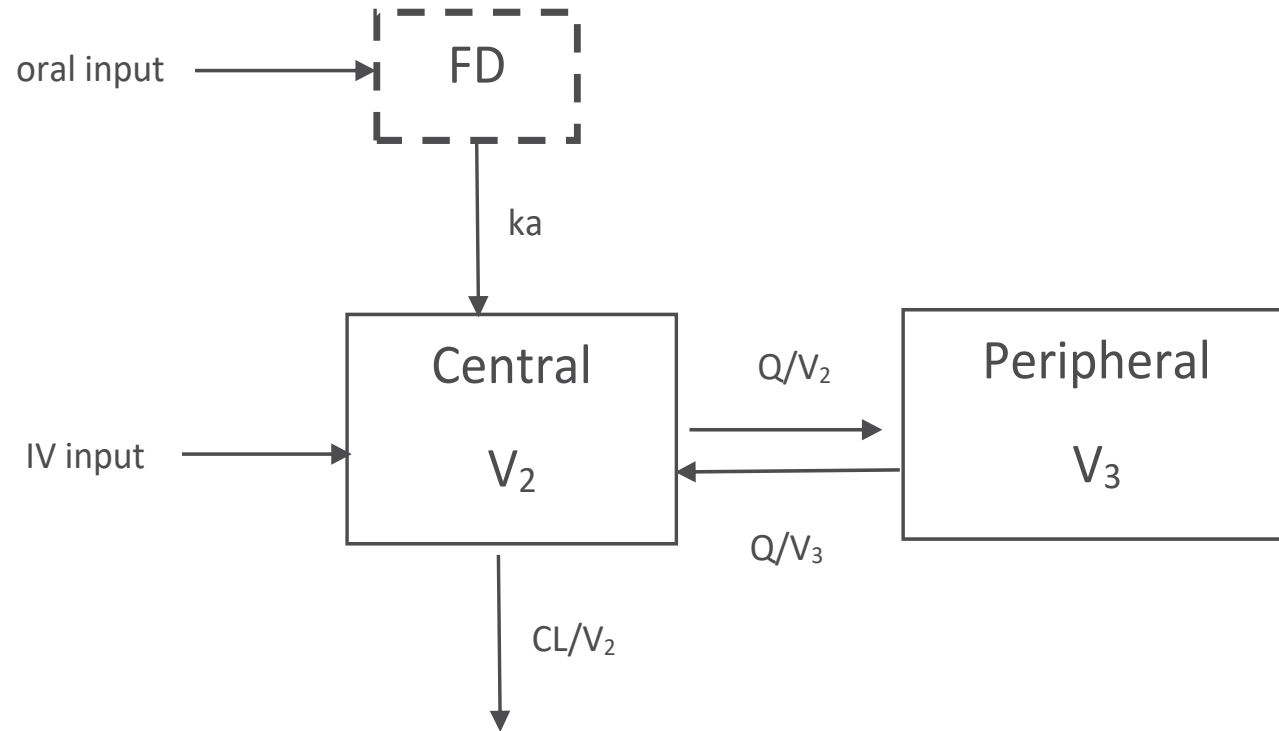

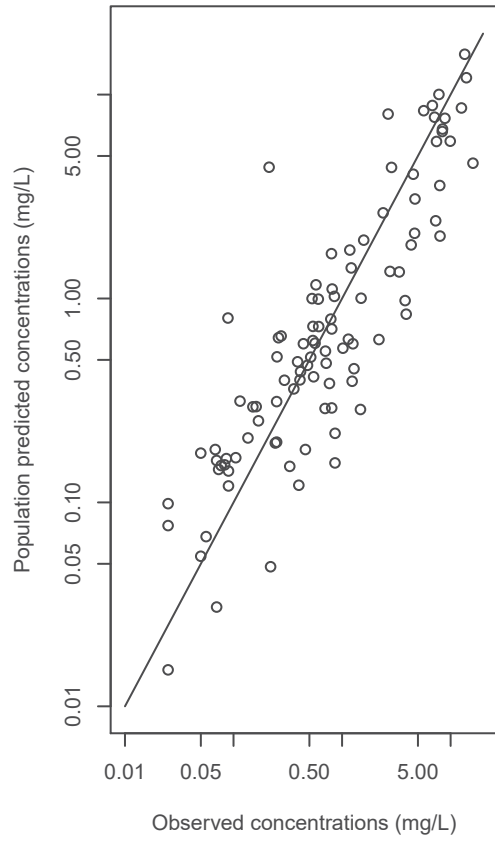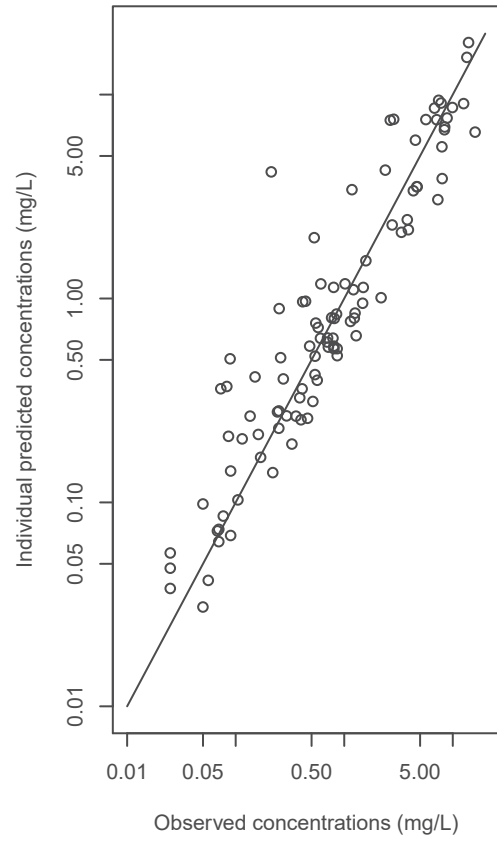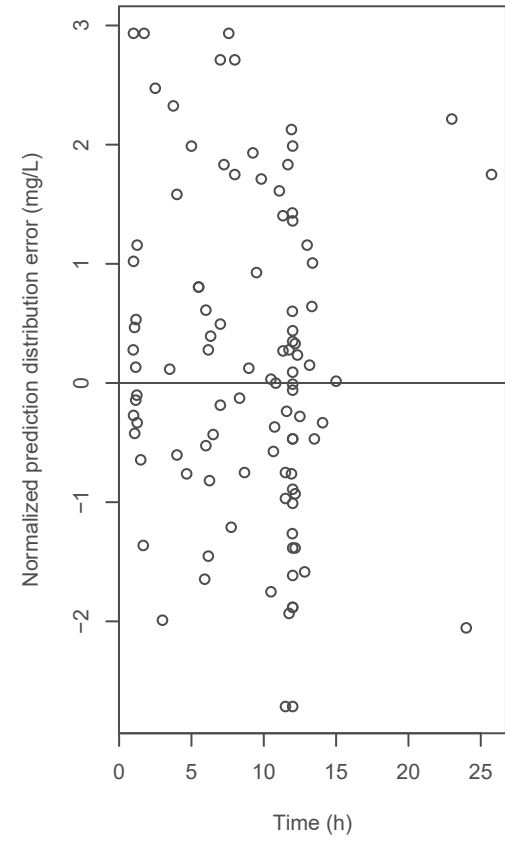

Oral administration

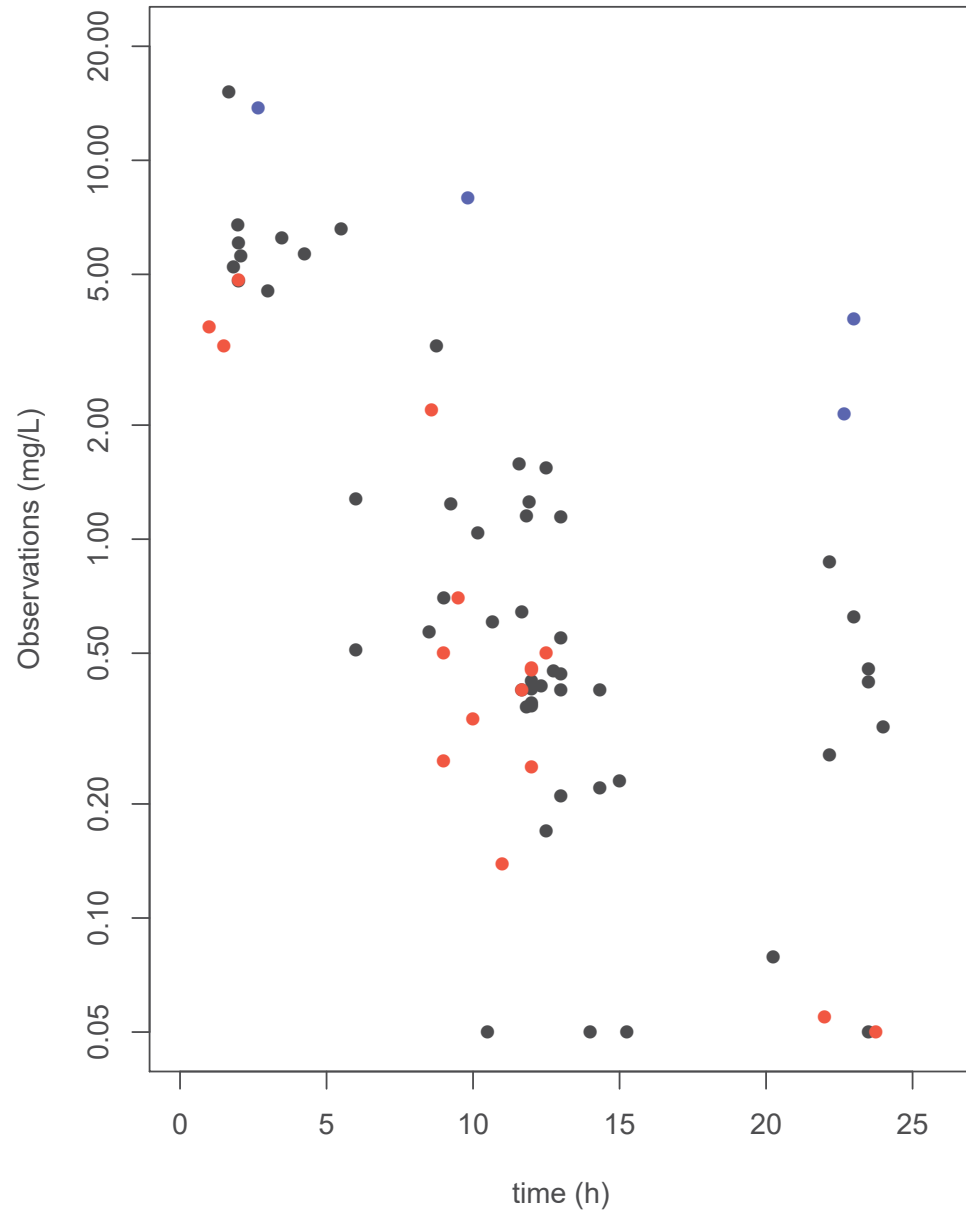

IV administration

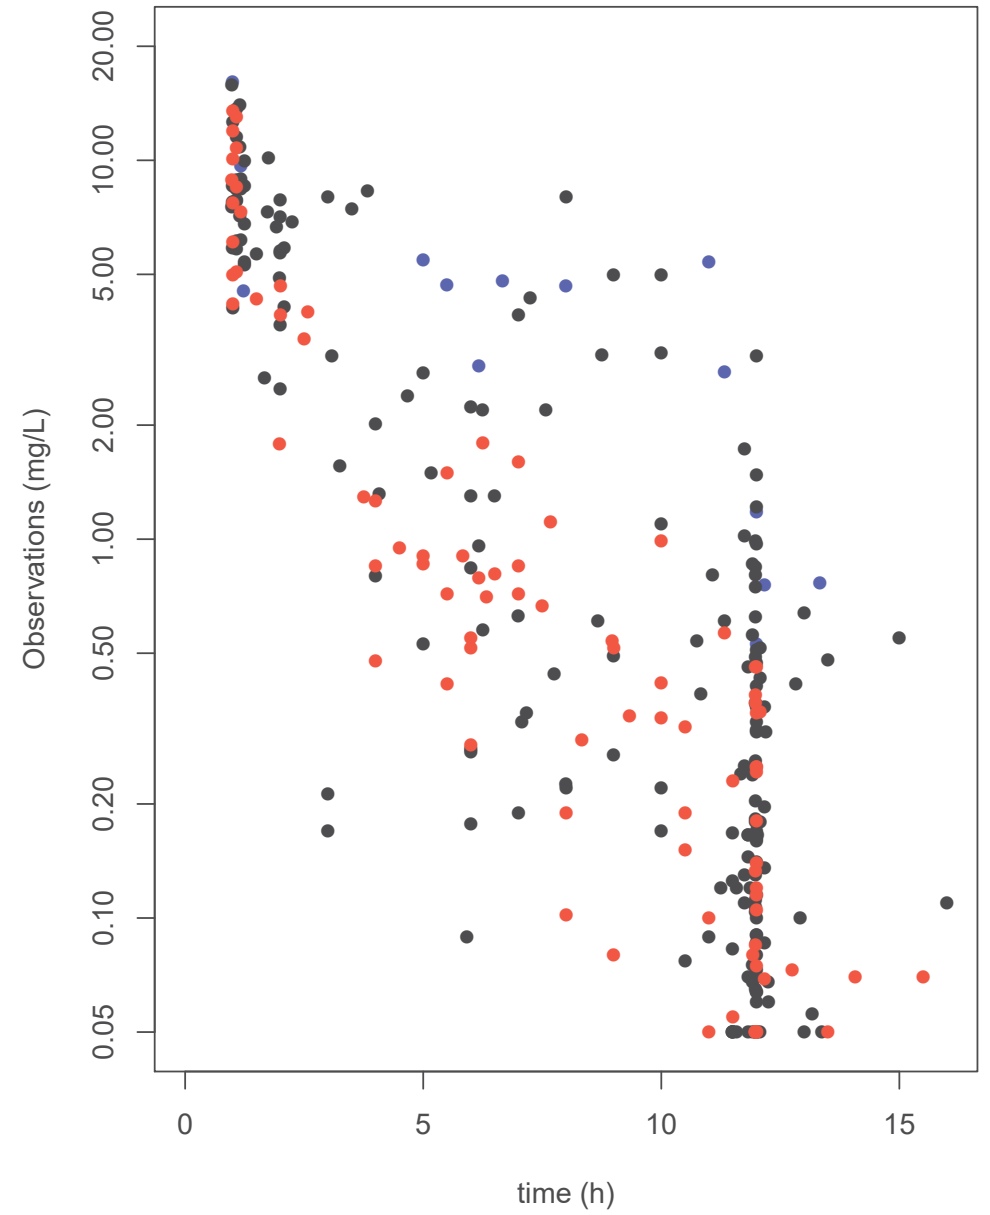

Supplemental figure 1 : Pharmacokinetic compartmental model for ganciclovir plasma concentration after oral or IV dose D. Parameters of this two-compartments model were: bioavailability (F), absorption rate constant ( $k_a$ ), volumes of distribution of central and peripheral compartments ( $V_2$  and  $V_3$ ), clearance (CL) and intercompartmental clearance (Q).

Supplemental figure 2, Validation on the remaining third of the data: Population (left) and individual (right) predicted concentration (log scale) as a function of observed concentration and normalized prediction distribution error as a function of time for the validation dataset.

Supplemental figure 3: Measured concentrations versus time after valganciclovir (left) and ganciclovir (right) administration. Blue points correspond to patients with low eGFR ( $eGFR < 70 \text{ mL/min/1.73m}^2$ ), black points to patients with medium eGFR ( $70 \leq eGFR < 200 \text{ mL/min/1.73m}^2$ ) and red points to patients with high eGFR ( $eGFR \geq 200 \text{ mL/min/1.73m}^2$ )
